# Supplementary material for: Cationic-anionic polyelectrolyte interaction as a tool to graft silver nanoparticles on hydroxyapatite crystals and prevent cytotoxicity
Source: Royal Society of Chemistry journal article supplement (doi:10.1039/c3ra45846f), 2013-11-01
Supplement: c3ra45846f.pdf [file c3ra45846f.pdf]

## Supporting Information

### **Cationic-anionic polyelectrolyte interaction as a tool to graft silver nanoparticles on hydroxyapatite crystals and prevent cytotoxicity.**

Elisa Boanini\*, Paola Torricelli, Maria Cristina Cassani\*, Giovanna Angela Gentilomi, Barbara Ballarin, Katia Rubini, Francesca Bonvicini, and Adriana Bigi

#### *Contents*

- Figures S1 to S8

- Table S1

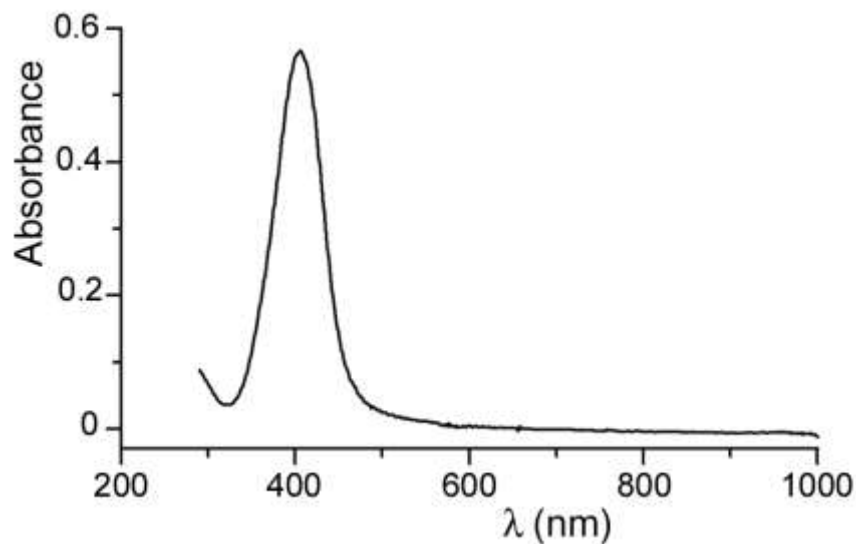

**Figure S1.** UV-vis spectrum of as-prepared AgNPs solution, which shows the surface plasmon resonance band of Ag nanoparticles at  $\lambda_{\text{max}} = 405$  nm and should indicate a mean diameter of about 25 nm.

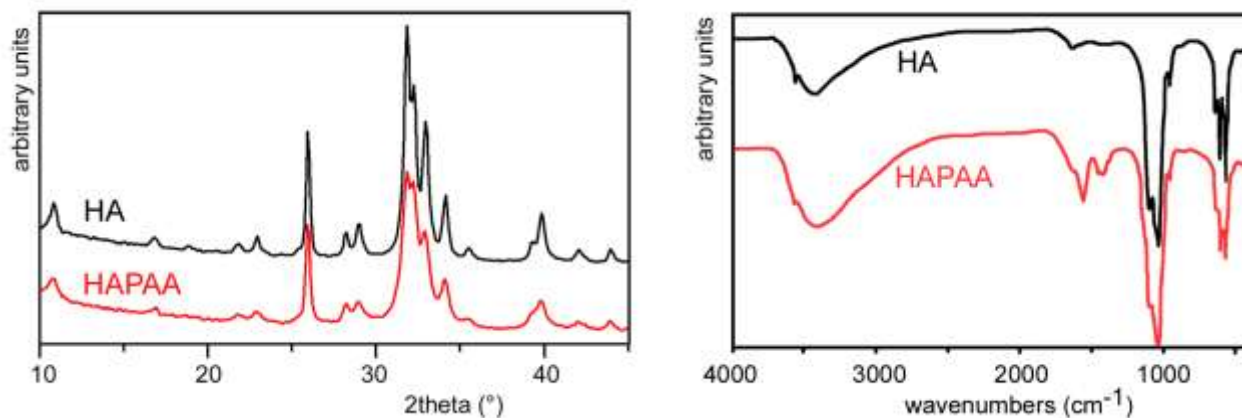

**Figure S2.** Powder X-ray diffraction patterns and IR spectra of HA and HAPAA. Samples obtained in the presence of polyacrylic acid are constituted of hydroxyapatite as unique crystalline phase, but show a reduced level of crystallinity evidenced both by the broadening of XRD reflections and by the lower intensity of OH<sup>-</sup> FTIR bands. IR spectrum of HAPAA also shows the presence of PAA bands in the range 1720-1410 cm<sup>-1</sup>.

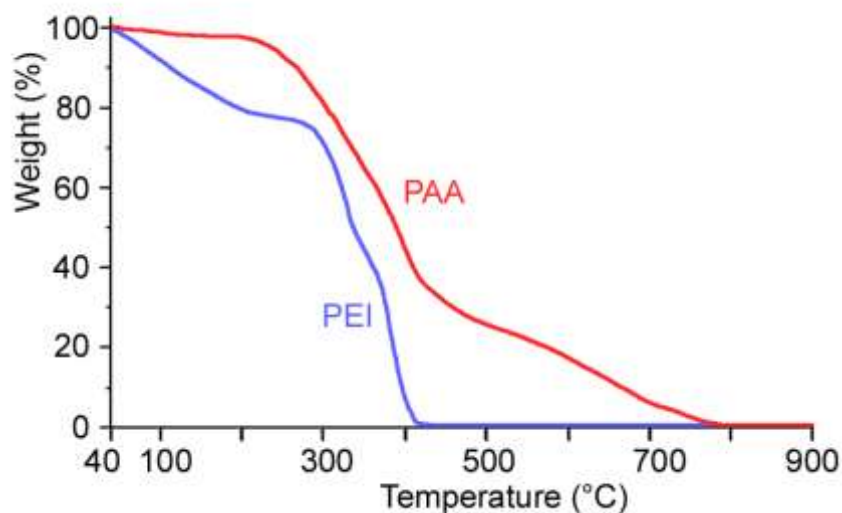

**Figure S3.** Thermogravimetric plots of PAA and PEI. Both polyelectrolytes undergo complete combustion within 800°C.

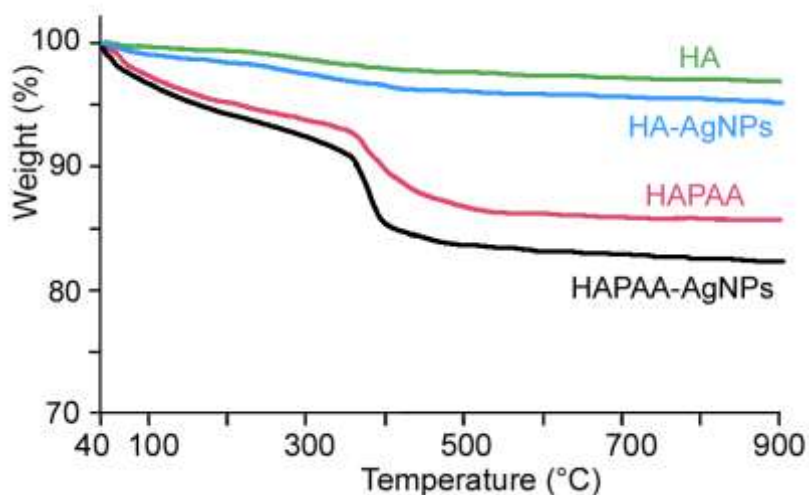

**Figure S4.** Thermogravimetric plots of HA, HAPAA, HA-AgNPs and HAPAA-AgNPs. HA plot does not show any significant weight loss up to 900°C. Therefore, the weight losses of the composite materials can be attributed to the presence of polyelectrolytes. No difference was appreciable between the plots of HAPAA-AgNPs, at variable silver content (the same holds true for HA-AgNPs).

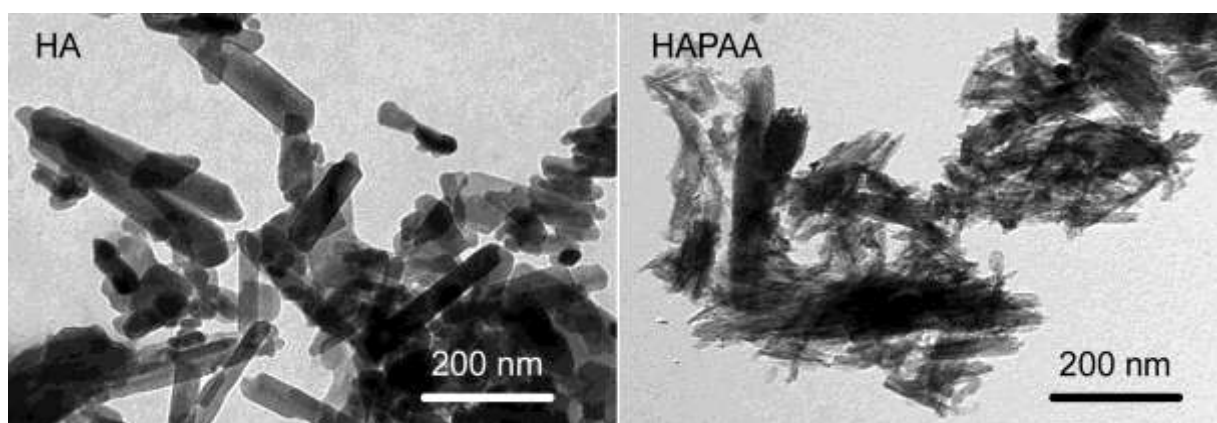

**Figure S5.** TEM images of HA and HAPAA crystals. HAPAA crystals exhibit reduced mean dimensions and a greater aspect ratio with respect to HA crystals.

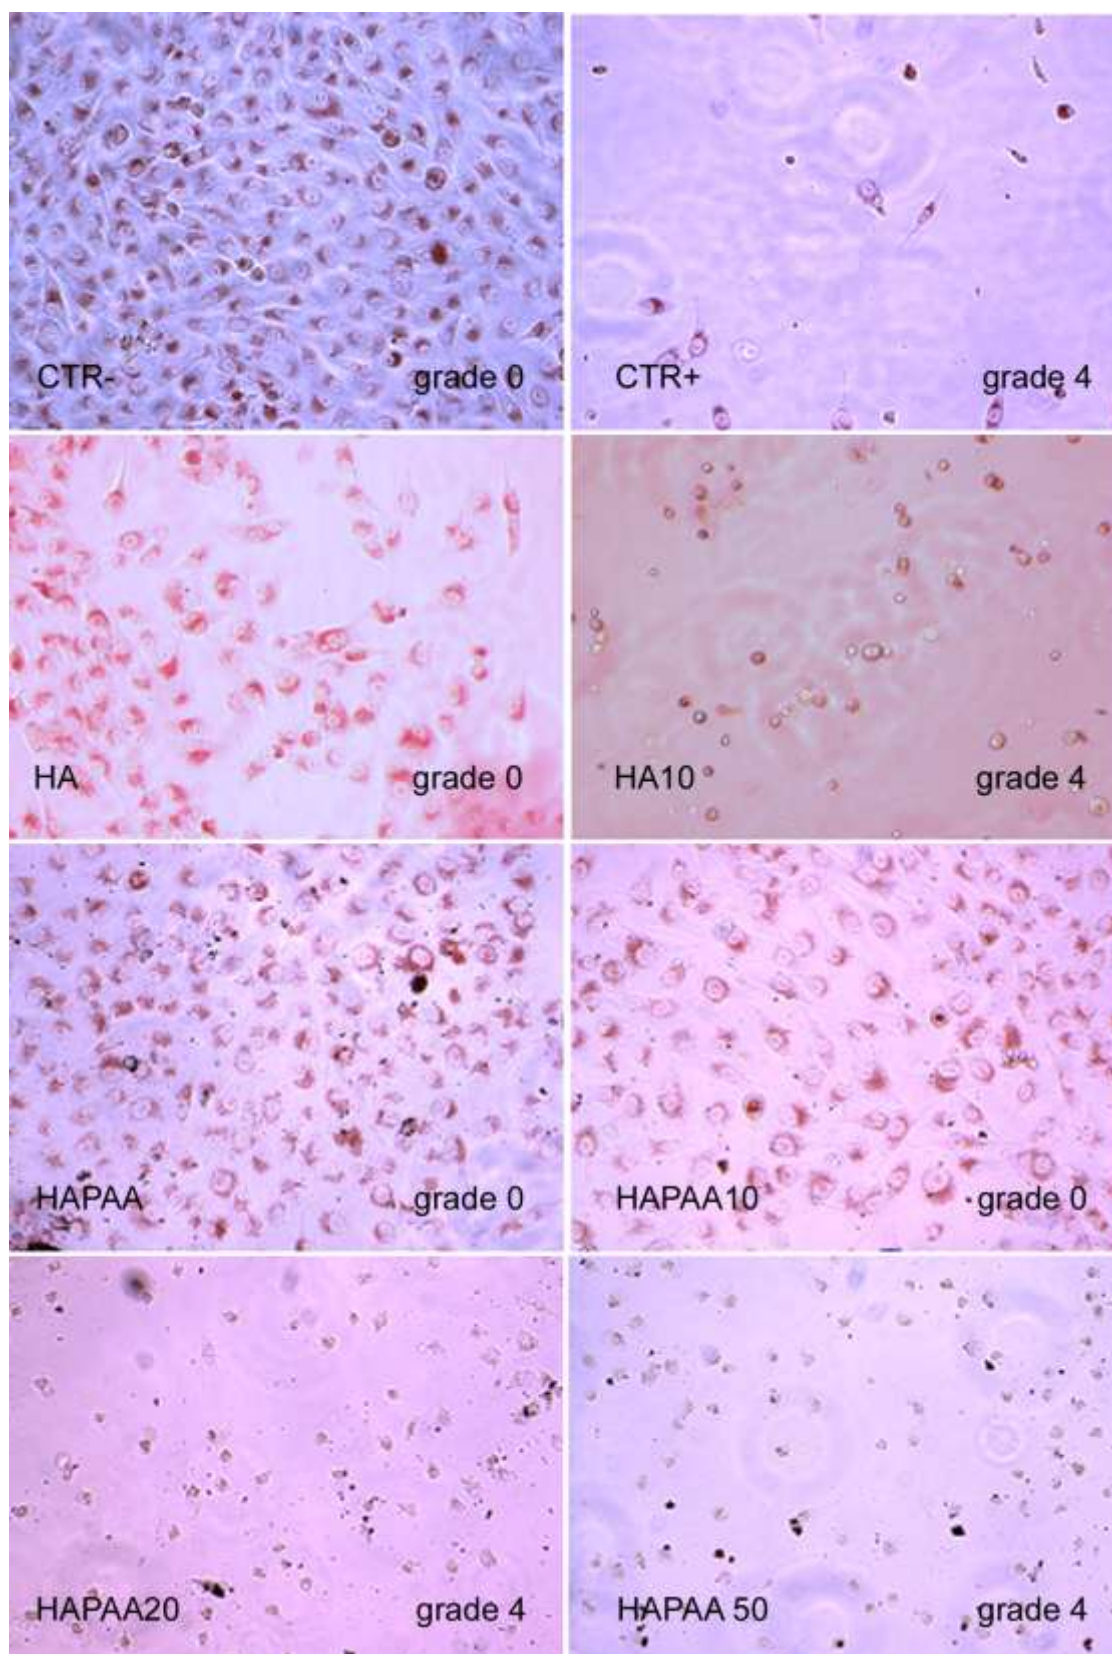

**Figure S6.** Microscopic images of MG63 osteoblast cultures after 48 h of incubation. Neutral Red staining. Magnification: 10x. Each image reports the relative qualitative grade of cytotoxicity (according to Table S1).

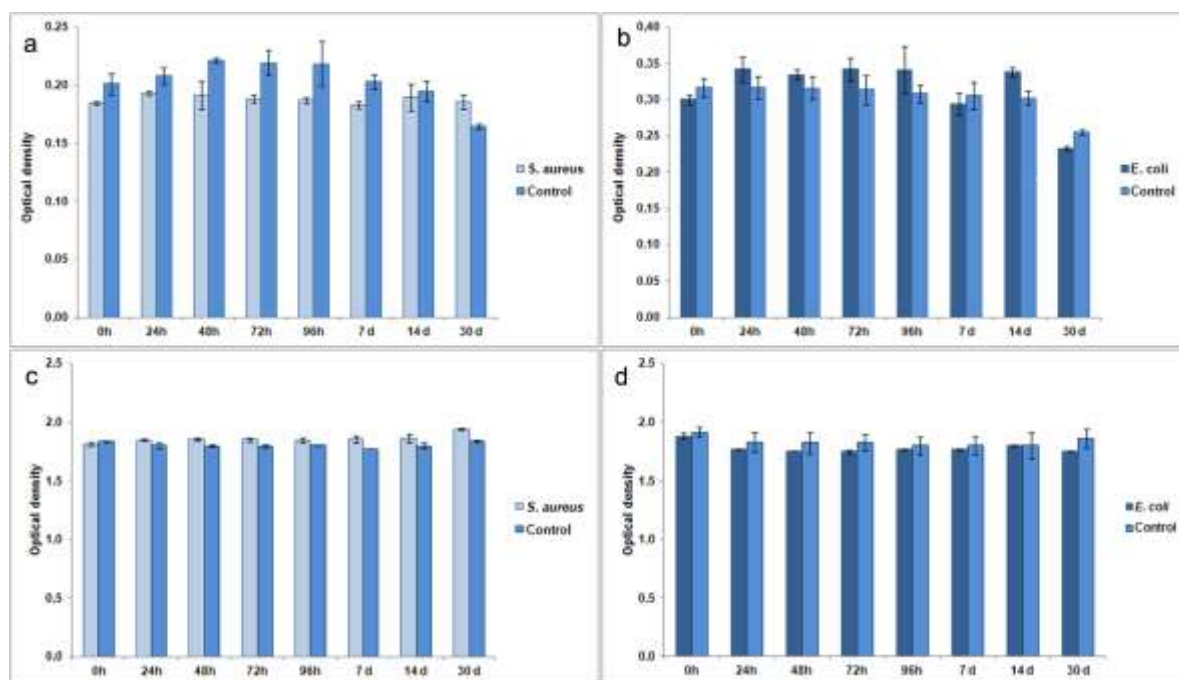

**Figure S7.** Bacterial growth in incubation media of HAPAA10 at 6 h (a,b) and 24 h (c,d) of *S. aureus* and *E. coli*.

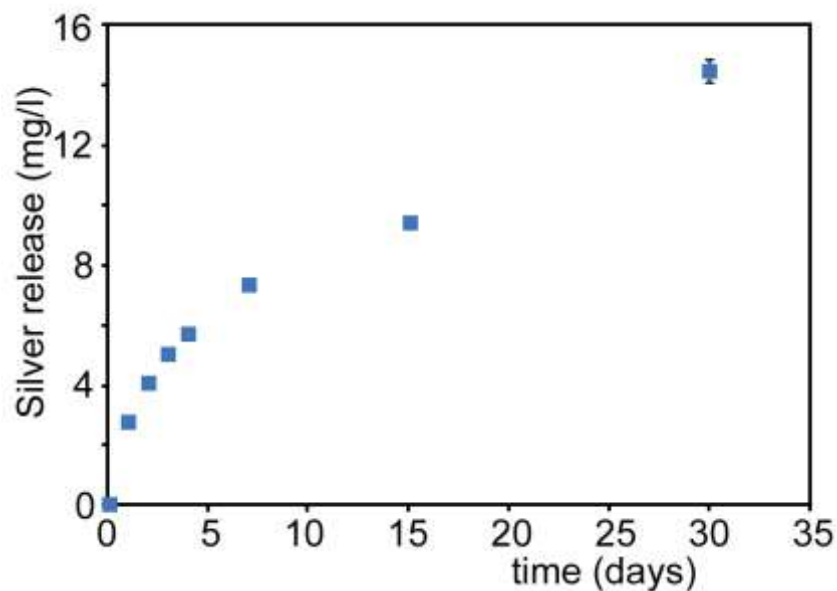

**Figure S8.** Release of silver from disk-shaped samples of HAPAA10 as a function of the storage time in Luria-Bertani medium. The standard deviation is reported just when the bars exceed the size of the symbols.

**Table S1.** Qualitative morphological grading of cytotoxicity.

| <b>grade</b> | <b>reaction</b> | <b>condition of cultures</b>                                                                                                                                                         |
|--------------|-----------------|--------------------------------------------------------------------------------------------------------------------------------------------------------------------------------------|
| 0            | none            | No cell lysis, no reduction of cell growth, discrete intercytoplasmatic granules.                                                                                                    |
| 1            | slight          | Not more than 20% of the cells are round, loosely attached and without intercytoplasmatic granules, or show changes in morphology; occasional lysed cells, slight growth inhibition. |
| 2            | mild            | Not more than 50% of the cells are round, devoid of intercytoplasmatic granules, cell lysis and not more than 50% growth inhibition.                                                 |
| 3            | moderate        | Not more than 70% of the cells are round and lysed, more than 50% growth inhibition.                                                                                                 |
| 4            | severe          | Nearly complete or complete destruction of the cell layer.                                                                                                                           |
